# Supplementary material
Source: Research Square preprint supplement (doi:10.21203/rs.3.rs-9530146/v1)
Supplement: Supplementary file 1 [file 506de9455683d438acb4204e.docx]

**Supplementary Materials:**

Supp. Mat. 1: Microsatellite loci used in this study and their annealing temperature (Ta).

| **Locus** | **Repeat motif** | **Primers5′ > 3′** | **Reference** | **Ta (°C)** |
| --- | --- | --- | --- | --- |
| 90TRE | (CA)4CTCATA(CA)17 | ATGCTGTCCACTTCCTCCAGC | Radhakrishnan et al. (2018) | 57 |
|  |  | TTTCTCAAACTCCTGCCCTTCC |  |  |
| C83Sc | (TG)5TC(TG)11 | ACGCAGCAATGCACCGTGG | van Herwerden et al. (2006) | 57 |
|  |  | AAGAATCAACACAAACAGCACC |  |  |
| D61Sc | (CA)13GA(CA)2GA(CA)4 | CTATCAGCAATTAAGTGTACTAC | van Herwerden et al. (2006) | 53 |
|  |  | TGTGAGAGGTTCAACAATG |  |  |
| E27Sc | (CA)11GA(CA)3 | TTAGTGCGACTCAGCAAC | van Herwerden et al. (2006) | 49 |
|  |  | TGGAACAGCAATGATTGCA |  |  |
| F6Sc | (TGTC)8 | TGATGAGGCTGAAAGACTGAC | van Herwerden et al. (2006) | 55 |
|  |  | AGGTAGTGACCAACGCTCC |  |  |
| H96Sc | (TG)5TT(TG)7AG(TG)4 | AAAGAATGGAAATTCAGATCAC | van Herwerden et al. (2006) | 53 |
|  |  | TAAAATGACATCATCCCATGG |  |  |
| J10Sc | (GATT)10 | CACAGTCCTCTGGACCAAAC | van Herwerden et al. (2006) | 57 |
|  |  | TCGTTGGAAACGGTCGCTGT |  |  |
| J43Sc | (TG)4CC(TG)15 | TGATCTAATCAATGGGAGAGG | van Herwerden et al. (2006) | 55 |
|  |  | TGCTCACATGTGCAAGCAAT |  |  |
| L42Sc | (CA)11AA(CA)3 | ATGGCAACGGCGAGATTAAGG | van Herwerden et al. (2006) | 57 |
|  |  | TCCAGAACAGCAGCAGTTTCC |  |  |
| Sa2657 | (CG)8 (AG)6 | TGTCAGAGATGTAGCACATACGG | Tang et al. (2009) | 54 |
|  |  | AGCATTATCTGGTGCTGTAAGGA |  |  |
| Sa2770 | (AC)15 (CCT)4 | AGAAATGAAAAGGGCTTTAAGGA | Tang et al. (2009) | 55 |
|  |  | ACTGAGCTGCTTAAAATGCAAAA |  |  |
| SCA8 | (CA)n | CAGCTGTTCATTCCCATAGCCCA | Broughton et al. (2000) | 53 |
|  |  | ATGAAGGAACAATGAGCCTCCAGC |  |  |
| SCA30 | (CA)n | TGGCTGTCGGTCACTCTGCCTC | Broughton et al. (2000) | 57 |
|  |  | ACACACACGGGTACACACAGGG |  |  |
| SCA37 | (GT)10 | GCGCCGTGACTTTTTATTGCTC | Broughton et al. (2000) | 55 |
|  |  | CAACAATTAGTCGCAGCCCTAG |  |  |
| SCA44 | (TCTG)8 | ATGGCCAAATGGCACATAATCA | Broughton et al. (2000) | 53 |
|  |  | GGGCAGCTCCATGGGTCTGAGT |  |  |
| SM3 | (CA)24 | GAAGGAGGAGGAGGAGCTGT | Used in Radhakrishnan et al. (2018) | 56 |
|  |  | GTTTCTTGGTCAGTCTGCCGG |  |  |

References:

Broughton, R. E., Stewart, L. B., & Gold, J. R. (2002). Microsatellite variation suggests substantial gene flow between king mackerel (*Scomberomorus cavalla*) in the western Atlantic Ocean and Gulf of Mexico. *Fisheries Research*, (54), 305–316. https://doi.org/10.1016/S0165-7836(01)00275-2

Radhakrishnan, D. P., Nedumpally, V., Kathirvelpandian, A., Saidmuhammed, B. V., & Gopalakrishnan, A. (2018). Population structure of Spanish mackerel *Scomberomorus commerson*  (Lacepede 1800) in the Northern Indian Ocean determined using microsatellite markers. *Aquatic Living Resources*, *31*, 22. https://doi.org/10.1051/alr/2018011

Tang, C. Y., Tzeng, C. H., Chen, C. S., & Chiu, T. S. (2009). Microsatellite DNA markers for population-genetic studies of blue mackerel (*Scomber australasicus*) and cross-specific amplification in S. japonicus. *Molecular Ecology Resources*, *9*(3), 824‑827. <https://doi.org/10.1111/j.1755-0998.2008.02278.x>

van Herwerden, L., McIlwain, J., Al-Oufi, H., Al-Amry, W., & Reyes, A. (2006). Development and application of microsatellite markers for *Scomberomorus commerson* (Perciformes; Teleostei) to a population genetic study of Arabian Peninsula stocks. *Fisheries Research*, *79*(3), 258‑266. <https://doi.org/10.1016/j.fishres.2006.04.004>

Supp. Mat. 2: Percentage of missing data (%NA) and number of alleles (Na) estimated for each locus, over all individuals and per region (RS: Red Sea, AG: Arabian Gulf)

| **Locus** | **%NA** | | | **Na** | | |
| --- | --- | --- | --- | --- | --- | --- |
|  | **Overall** | **AG** | **RS** | **Overall** | **AG** | **RS** |
| 90TRE | 2.86 | 2.85 | 2.85 | 8 | 6 | 8 |
| C83Sc | 0.00 | 0.00 | 0.00 | 10 | 7 | 10 |
| D61Sc | 43.81 | 28.57 | 51.43 | 21 | 13 | 19 |
| E27Sc | 38.10 | 11.43 | 51.43 | 2 | 2 | 2 |
| F6Sc | 1.91 | 2.86 | 1.43 | 8 | 8 | 7 |
| H96Sc | 5.72 | 11.43 | 2.86 | 6 | 6 | 5 |
| J10Sc | 4.77 | 5.71 | 4.29 | 7 | 3 | 7 |
| J43Sc | 0.96 | 2.86 | 0.00 | 10 | 8 | 10 |
| L42Sc | 6.67 | 8.57 | 5.71 | 28 | 20 | 22 |
| Sa2657 | 7.62 | 0.00 | 11.43 | 9 | 7 | 8 |
| Sa2770 | 71.43 | 78.57 | 76.20 | NA | NA | NA |
| SCA8 | 1.90 | 71.43 | 78.57 | 31 | 22 | 27 |
| SCA30 | 0.96 | 2.85 | 0.00 | 34 | 23 | 33 |
| SCA37 | 0.96 | 0.00 | 1.43 | 23 | 13 | 22 |
| SCA44 | 33.34 | 11.43 | 44.28 | 11 | 10 | 10 |
| SM3 | 32.38 | 5.71 | 45.71 | 14 | 13 | 13 |

Supp. Mat. 3: Basic diversity and differentiation statistics by locus. Ho: observed heterozygosity, Hs: mean gene diversities within population, Ht (H’t): Overall (and corrected) gene diversity, DST (D’ST): amount of gene diversity (and corrected) among samples, FIS: Inbreeding coefficient, FST (F’ST ): Fixation Index (and corrected), and Dest: Actual/Absolute Differentiation (Jost's D). FST, F’ST, and FIS following Nei (1987).

| **Locus** | **Ho** | **Hs** | **Ht** | **H’t** | **DST** | **D’ST** | **FIS** | **FST** | **F’ST** | **Dest** |
| --- | --- | --- | --- | --- | --- | --- | --- | --- | --- | --- |
| 90TRE | 0.7794 | 0.6398 | 0.6469 | 0.6540 | 0.0071 | 0.0142 | -0.2182 | 0.0109 | 0.0217 | 0.0393 |
| C83Sc | 0.9000 | 0.7237 | 0.7241 | 0.7246 | 0.0005 | 0.0009 | -0.2437 | 0.0006 | 0.0013 | 0.0033 |
| D61Sc | 0.4194 | 0.8612 | 0.8696 | 0.8779 | 0.0084 | 0.0168 | 0.5130 | 0.0096 | 0.0191 | 0.1208 |
| E27Sc | 0.1366 | 0.2038 | 0.2039 | 0.2040 | 0.0001 | 0.0002 | 0.3295 | 0.0006 | 0.0011 | 0.0003 |
| F6Sc | 0.5769 | 0.7454 | 0.7629 | 0.7804 | 0.0175 | 0.0350 | 0.2260 | 0.0229 | 0.0448 | 0.1374 |
| H96Sc | 0.6608 | 0.6360 | 0.6555 | 0.6750 | 0.0195 | 0.0391 | -0.0391 | 0.0298 | 0.0579 | 0.1073 |
| J10Sc | 0.4358 | 0.4407 | 0.4401 | 0.4395 | -0.0006 | -0.0012 | 0.0113 | -0.0014 | -0.0028 | -0.0022 |
| J43Sc | 0.7458 | 0.8028 | 0.7990 | 0.7953 | -0.0038 | -0.0075 | 0.0710 | -0.0047 | -0.0095 | -0.0382 |
| L42Sc | 0.7921 | 0.9205 | 0.9182 | 0.9160 | -0.0023 | -0.0046 | 0.1395 | -0.0025 | -0.0050 | -0.0576 |
| Sa2657 | 0.5555 | 0.7483 | 0.7636 | 0.7790 | 0.0154 | 0.0308 | 0.2576 | 0.0201 | 0.0395 | 0.1222 |
| SCA8 | 0.8550 | 0.9193 | 0.9204 | 0.9215 | 0.0011 | 0.0022 | 0.0699 | 0.0012 | 0.0024 | 0.0275 |
| SCA30 | 0.8332 | 0.9456 | 0.9469 | 0.9482 | 0.0013 | 0.0026 | 0.1189 | 0.0014 | 0.0027 | 0.0479 |
| SCA37 | 0.7263 | 0.6455 | 0.6456 | 0.6457 | 0.0001 | 0.0001 | -0.1251 | 0.0001 | 0.0002 | 0.0004 |
| SCA44 | 0.8908 | 0.8094 | 0.8141 | 0.8189 | 0.0047 | 0.0095 | -0.1006 | 0.0058 | 0.0115 | 0.0496 |
| SM3 | 0.8058 | 0.8949 | 0.8991 | 0.9033 | 0.0042 | 0.0084 | 0.0996 | 0.0047 | 0.0093 | 0.0797 |
| Overall | 0.6742 | 0.7291 | 0.7340 | 0.7389 | 0.0049 | 0.0098 | 0.0753 | 0.0066 | 0.0132 | 0.0360 |

Supp. Mat. 4: Hierarchical genetic differentiation using Analysis of Molecular Variance (AMOVA) for COI region. SSD: Sum of Squared Deviations

| **Source of variation** | **df** | **SSD** | **Variance components** | **% Total Variation** | **P-value** |
| --- | --- | --- | --- | --- | --- |
| Between regions | 1 | 2.241629e-05 | 3.5138e-07 | 4.46% | 0.058 |
| Within regions | 96 | 7.221379e-04 | 7.5223e-06 | 95.54% |  |
| Total | 97 | 7.445542e-04 | 7.87e-06 | 100% |  |

*FST*=0.0446; Significance was tested using 1,000 permutations.

Supp. Mat. 5: Hierarchical genetic differentiation using Analysis of Molecular Variance (AMOVA) for D-loop region. SSD: Sum of Squared Deviations

| **Source of variation** | **df** | **SSD** | **Variance components** | **% Total Variation** | **P-value** |
| --- | --- | --- | --- | --- | --- |
| Between regions | 1 | 0.00238 | 0.000041 | 7.85% | 0.001* |
| Within regions | 102 | 0.04964 | 0.000487 | 92.15% |  |
| Total | 103 | 0.05202 | 0.000528 | 100% |  |

*FST*=0.0785; * Significant at (p<0.05) based on 1,000 permutations.

Supp. Mat. 6: Hierarchical genetic differentiation using AMOVA results and permutation tests (999 permutations) computed on the microsatellite dataset. 8 loci with >5% missing data were removed (D61Sc, E27Sc, H96Sc, L42Sc, Sa2657, Sa2770, SCA44, SM3). SSD: Sum of Squared Deviations.

| **Source of variation** | **df** | **SSD** | **Variance components** | **% of Variation** | **Phi statistic** | **P-value** |
| --- | --- | --- | --- | --- | --- | --- |
| Between regions | 1 | 9.920 | 0.0424 | 0.71% | 0.0071 | <0.001 |
| Within regions | 103 | 614.003 | 0.0305 | 0.51% | 0.0051 | 0.365 |
| Within individuals | 105 | 619.515 | 5.9001 | 98.78% | 0.0122 | 0.312 |
| Total | 209 | 1243.437 | 5.9731 | 100% |  |  |

Sup. Mat. 7: Effective population size estimation-based Linkage Disequilibrium Method inferred on 15 microsatellite loci for the Arabian Gulf (35 individuals) and Red Sea (70 individuals) populations. Cis: Confidence Intervals.

|  | **Arabian Gulf (N=35)** | | **Red Sea (N=70)** | | **Overall (N=105)** | |
| --- | --- | --- | --- | --- | --- | --- |
| Lowest Allele Frequency Used | 0.05 | 0.02 | 0.05 | 0.02 | 0.05 | 0.02 |
| Estimated Ne | 125.6 | 232.6 | Infinite | Infinite | 3733.5 | 1010.6 |
| 95% CIs | 66.3 - 619.4 | 113.6-10728.8 | 3438.9 - Infinite | 3345.9 - Infinite | 393.9 - Infinite | 437.9 - Infinite |
